# Supplementary material for: The Transcriptional Targets of Mutant FOXL2 in Granulosa Cell Tumours
Source: PLoS One. 2012 Sep 28;7(9):e46270. doi: 10.1371/journal.pone.0046270 (PMC3460904; doi:10.1371/journal.pone.0046270)
Supplement: File S1 — Genes shown to have similar regulation when comparing our gene list with that generated by Batista et al (2007). (XLSX) [file pone.0046270.s001.xlsx]

## Sheet: overexpression data
gene symbol	gene name	fold change observed
		Batista et al, 2007	wildtype overexpression	mutant overexpression
TBXA2R	thromboxane A2 receptor	-3.40039	-1.19168	-1.18674
FRMD4B	FERM domain containing 4B	-3.14433	-1.20581	-1.19086
CEP78	centrosomal protein 78kDa	-2.63983	-1.3113	-1.3333
APOB	apolipoprotein B (including Ag(x) antigen)	-2.48587	-1.41421	-1.37554
RCVRN	recoverin	-2.38376	-1.21083	-1.23371
EXOC3L	exocyst complex component 3-like	-2.30429	-1.02527	-1.04826
CARD8	caspase recruitment domain family, member 8	-2.26473	-1.13603	-1.26663
SCARA5	scavenger receptor class A, member 5 (putative)	-2.23198	-1.25788	-1.30134
CDKN3	cyclin-dependent kinase inhibitor 3	-2.21008	-1.08222	-1.15189
LOC646903	hypothetical LOC646903	-2.20141	-1.39862	-1.30586
LAMA5	laminin, alpha 5	-2.16091	-1.39668	-1.06659
GPR63	G protein-coupled receptor 63	-2.05674	-1.38032	-1.36509
SELL	selectin L	2.04091	1.31494	1.42701
NR1D1	nuclear receptor subfamily 1, group D, member 1	2.04429	1.21335	1.60103
ATF3	activating transcription factor 3	2.07186	1.40153	1.37268
DNAJC27	DnaJ (Hsp40) homolog, subfamily C, member 27	2.07489	1.34164	1.39668
MPDU1	mannose-P-dolichol utilization defect 1	2.13769	1.42306	1.38415
MYLK3	myosin light chain kinase 3	2.16545	1.1479	1.14711
RND1	Rho family GTPase 1	2.17856	1.25006	1.25963
IGKC	immunoglobulin kappa constant	2.25497	1.24487	1.29056
PSG4	pregnancy specific beta-1-glycoprotein 4	2.32453	1.31585	1.27103
FGFR2	fibroblast growth factor receptor 2	2.34243	1.32593	1.35191
CHN2	chimerin (chimaerin) 2	2.34472	1.22349	1.13131
IGDCC3	immunoglobulin superfamily, DCC subclass, member 3	2.42415	1.04174	1.23885
MLN	motilin	2.77349	1.30044	1.4025
FAM43A	family with sequence similarity 43, member A	5.33297	1.1235	1.58447

## Sheet: knockdown data
gene symbol	gene name	fold change observed
		Batista et al, 2007	mutant knockdown
MB	myoglobin	-3.46116	1.26488
TBXA2R	thromboxane A2 receptor	-3.40039	1.01748
DPCR1	diffuse panbronchiolitis critical region 1	-3.09578	1.06733
SMAD6	SMAD family member 6	-2.56994	1.20581
NA	NA	-2.52127	1.04319
DOK7	docking protein 7	-2.51785	1.20832
APOB	apolipoprotein B (including Ag(x) antigen)	-2.48587	1.23114
MYO15A	myosin XVA	-2.44901	1.27544
RDM1	RAD52 motif 1	-2.44524	1.19086
FLJ42875	hypothetical LOC440556	-2.4159	1.36604
LST1	leukocyte specific transcript 1	-2.41168	1.0629
PPM1B	protein phosphatase 1B (formerly 2C), magnesium-dependent, beta isoform	-2.40162	1.15829
SNX26	sorting nexin 26	-2.38835	1.0519
FOXS1	forkhead box S1	-2.35529	1.37841
NPFFR1	neuropeptide FF receptor 1	-2.32423	1.22519
CADM3	cell adhesion molecule 3	-2.2404	1.05555
KIAA1875	KIAA1875	-2.21062	1.22179
INHBB	inhibin, beta B	-2.1766	1.51152
SCGB3A1	secretoglobin, family 3A, member 1	-2.15772	1.18509
PITX3	paired-like homeodomain 3	-2.13804	1.2605
LTBP4	latent transforming growth factor beta binding protein 4	-2.08775	1.20832
TCEA3	transcription elongation factor A (SII), 3	-2.07268	1.15669
EDA	ectodysplasin A	-2.06112	1.08523
C2orf80	chromosome 2 open reading frame 80	-2.05057	1.264
HR	hairless homolog (mouse)	-2.03181	1.02385
FAM176B	family with sequence similarity 176, member B	-2.0265	1.10343
IL6R	interleukin 6 receptor	2.01236	-1.2781
TMOD1	tropomodulin 1	2.0136	-1.30405
KIAA1211	KIAA1211	2.01936	-1.04536
SAT1	spermidine/spermine N1-acetyltransferase 1	2.04607	-1.05775
C9orf72	chromosome 9 open reading frame 72	2.04778	-1.00626
HHEX	hematopoietically expressed homeobox	2.04856	-1.18591
PAQR3	progestin and adipoQ receptor family member III	2.06853	-1.54649
DNAJC27	DnaJ (Hsp40) homolog, subfamily C, member 27	2.07489	-1.2781
SOD2	superoxide dismutase 2, mitochondrial	2.08952	-1.03025
RAPGEF5	Rap guanine nucleotide exchange factor (GEF) 5	2.11631	-1.0367
FCGR2C	Fc fragment of IgG, low affinity IIc, receptor for (CD32)	2.11702	-1.15829
GEM	GTP binding protein overexpressed in skeletal muscle	2.12073	-1.18345
TSPAN2	tetraspanin 2	2.13584	-1.12272
CLCN3	chloride channel 3	2.14216	-1.19334
C21orf88	chromosome 21 open reading frame 88	2.14478	-1.18345
HSPA6	heat shock 70kDa protein 6 (HSP70B')	2.15609	-1.10803
STEAP4	STEAP family member 4	2.17333	-1.2544
IQCH	IQ motif containing H	2.23001	-1.09051
CHD7	chromodomain helicase DNA binding protein 7	2.37022	-1.20164
SESN2	sestrin 2	2.39267	-1.38032
NR4A3	nuclear receptor subfamily 4, group A, member 3	2.45372	-1.19748
ADAMTS18	ADAM metallopeptidase with thrombospondin type 1 motif, 18	2.4783	-1.09126
DYNC2LI1	dynein, cytoplasmic 2, light intermediate chain 1	2.48799	-1.16554
XAGE3	X antigen family, member 3	3.01383	-1.32225
CDKN2A	cyclin-dependent kinase inhibitor 2A (melanoma, p16, inhibits CDK4)	8.2525	-1.00486
