# Supplementary material for: The Transcriptional Targets of Mutant FOXL2 in Granulosa Cell Tumours
Source: PLoS One. 2012 Sep 28;7(9):e46270. doi: 10.1371/journal.pone.0046270 (PMC3460904; doi:10.1371/journal.pone.0046270)
Supplement: File S2 — Outline of genes regulated by mutant FOXL2 shown to be enriched for functions of tumourigenesis, cell death and proliferation. (XLSX) [file pone.0046270.s002.xlsx]

## Sheet: proliferation
© 2000-2011 Ingenuity Systems, Inc. All rights reserved.
Category	Functions Annotation	p-Value	Molecules	# Molecules
Cellular Growth and Proliferation	proliferation of cells	6.66E-07	AMELX, AR, ATAD2, B3GNT5, BMPR1B, BTG2, BTK, CCDC88A, CDK6, CDKN1A, CDKN1C, CHRNA10, CLEC7A, CREB1, CST6, E2F8, EMP2, EPHA2, EPHB2, F12, FGF1, FGF18, FIP1L1, FLT4, FOXF2, FPR2, FTL, GAD1, HHEX, HOXA9, HOXC6, HSPD1, ID1, ID2, ID3, IGF1R, INHBA, ISG20, JUN, KIF11, LAMA4, LEFTY1, MAP2K5, MAP3K3, MBD2, MDM2, MGP, MLL, NFKBIA, NGFR, NKX2-8, NKX3-1, NPAS3, NRIP1, PGF, PIAS1, PPARA, PRKCB, PRKRA, RAP1GA…	73
Cellular Growth and Proliferation	proliferation of eukaryotic cells	1.13E-05	AR, ATAD2, B3GNT5, BMPR1B, BTG2, BTK, CDK6, CDKN1A, CDKN1C, CLEC7A, CREB1, CST6, E2F8, EPHA2, F12, FGF1, FGF18, FIP1L1, FLT4, FOXF2, FPR2, FTL, GAD1, HOXA9, HOXC6, HSPD1, ID1, ID2, ID3, IGF1R, INHBA, ISG20, JUN, LAMA4, MAP2K5, MAP3K3, MDM2, MGP, MLL, NFKBIA, NGFR, NKX2-8, NKX3-1, NPAS3, NRIP1, PGF, PIAS1, PPARA, PRKCB, RAP1GAP, S1PR2, S1PR3, SMAD3, SOX8, SUZ12, TXK, WT1	57
Cellular Growth and Proliferation	proliferation of normal cells	1.90E-05	AR, B3GNT5, BMPR1B, BTK, CDK6, CDKN1A, CDKN1C, CREB1, EPHA2, FGF1, FGF18, FLT4, FOXF2, FPR2, FTL, GAD1, HOXA9, HSPD1, ID1, ID2, ID3, IGF1R, INHBA, ISG20, JUN, LAMA4, MAP2K5, MAP3K3, MDM2, MGP, MLL, NFKBIA, NGFR, NKX2-8, NKX3-1, NPAS3, PGF, PPARA, PRKCB, S1PR2, S1PR3, SMAD3, SOX8, TXK, WT1	45
Cellular Growth and Proliferation	proliferation of adenocarcinoma cells	2.36E-05	ID1, ID2, ID3	3
Cellular Growth and Proliferation	proliferation of epithelial cells	6.56E-05	AR, CDK6, CDKN1A, CDKN1C, EPHA2, FGF1, FOXF2, ID1, ID2, INHBA, MAP2K5, NFKBIA, NKX2-8, NKX3-1, SMAD3	15
Cellular Growth and Proliferation	growth of normal cells	1.41E-04	AR, BTK, CDKN1A, CREB1, FGF1, FLT4, HOXA9, ID2, ID3, IGF1R, INHBA, JUN, MDM2, MLL, NGFR, PPARA, SMAD3, SMARCA5, WT1	19
Cellular Growth and Proliferation	growth of keratinocytes	4.14E-04	CDKN1A, ID2, JUN, SMAD3	4
Cellular Growth and Proliferation	proliferation of cell lines	5.34E-04	AR, ATAD2, BTG2, CDKN1A, CLEC7A, CST6, E2F8, EPHA2, F12, FGF1, FGF18, FIP1L1, FPR2, HOXC6, HSPD1, ID1, ID2, IGF1R, INHBA, JUN, MDM2, NGFR, NKX3-1, NRIP1, PIAS1, PRKCB, RAP1GAP, S1PR2, S1PR3, SUZ12, WT1	31
Cellular Growth and Proliferation	proliferation of hepatoma cell lines	6.70E-04	E2F8, F12, INHBA, S1PR2, S1PR3	5
Cellular Growth and Proliferation	growth of cells	9.50E-04	ADAM12, AR, ASGR1, BAG4, BTG2, BTK, CAMK2N1, CAMK2N2, CDC42, CDK6, CDKN1A, CDKN1C, CREB1, EMILIN2, EPHA2, FGF1, FGF18, FLT4, FOLR2, FTL, GNLY, HOXA9, HOXC6, HSPD1, ID1, ID2, ID3, IGF1R, INHBA, JUN, LTBP3, MAFF, MAP2K5, MBD2, MDM2, MLL, NFKBIA, NGFR, PGF, PPARA, PTPN14, RAP1GAP, S1PR2, SLC30A1, SMAD3, SMARCA5, WT1	47
Cellular Growth and Proliferation	proliferation of tumor cell lines	1.17E-03	AR, ATAD2, CDKN1A, CST6, E2F8, EPHA2, F12, FGF1, HOXC6, ID1, ID2, IGF1R, INHBA, JUN, MDM2, NGFR, NKX3-1, NRIP1, PRKCB, RAP1GAP, S1PR2, S1PR3, SUZ12, WT1	24
Cellular Growth and Proliferation	proliferation of breast cancer cell lines	1.29E-03	AR, ATAD2, CDKN1A, CST6, EPHA2, FGF1, ID1, ID2, IGF1R	9
Cellular Growth and Proliferation	growth of eukaryotic cells	1.46E-03	AR, BAG4, BTG2, BTK, CAMK2N1, CAMK2N2, CDC42, CDK6, CDKN1A, CREB1, EMILIN2, EPHA2, FGF1, FGF18, FLT4, FTL, HOXA9, HOXC6, ID1, ID2, ID3, IGF1R, INHBA, JUN, MBD2, MDM2, MLL, NGFR, PPARA, PTPN14, SLC30A1, SMAD3, SMARCA5, WT1	34
Cellular Growth and Proliferation	proliferation of connective tissue cells	1.68E-03	AR, BMPR1B, CDK6, CDKN1A, FGF1, FGF18, INHBA, JUN, MDM2, NGFR, PGF, SMAD3, SOX8	13
Cellular Growth and Proliferation	arrest in growth of eukaryotic cells	1.75E-03	BTG2, CDC42, CDK6, CDKN1A, FGF1, ID3, MDM2, SMARCA5	8
Cellular Growth and Proliferation	colony formation of colony forming multilineage cells	1.94E-03	HOXA9, MLL	2
Cellular Growth and Proliferation	growth of connective tissue cells	1.96E-03	CDKN1A, FGF1, IGF1R, JUN, MDM2, MLL, SMAD3	7
Cellular Growth and Proliferation	formation of myotube	2.03E-03	ADAM12, CDKN1A, CDKN1C, IGF1R	4
Cellular Growth and Proliferation	arrest in growth of pheochromocytoma cell lines	3.19E-03	BTG2, CDKN1A	2
Cellular Growth and Proliferation	proliferation of liver cells	3.41E-03	CDKN1A, FGF18, IGF1R, NGFR, PPARA, S1PR2, SMAD3	7
Cellular Growth and Proliferation	arrest in growth of normal cells	3.61E-03	CDKN1A, ID3, MDM2, SMARCA5	4
Cellular Growth and Proliferation	growth of tumor cell lines	4.63E-03	AR, BTG2, CAMK2N1, CAMK2N2, CDC42, CDKN1A, CREB1, EMILIN2, EPHA2, FGF1, FTL, HOXC6, ID1, IGF1R, INHBA, JUN, MBD2, MDM2, MLL, PTPN14, WT1	21
Cellular Growth and Proliferation	colony formation of hepatoma cell lines	4.73E-03	E2F8, GADD45B	2
Cellular Growth and Proliferation	proliferation of hepatocytes	4.81E-03	CDKN1A, FGF18, IGF1R, NGFR, PPARA, S1PR2	6
Cellular Growth and Proliferation	growth of breast cancer cell lines	5.08E-03	AR, BTG2, EPHA2, FGF1, IGF1R, INHBA, JUN, MBD2	8
Cellular Growth and Proliferation	proliferation of lymphatic system cells	6.10E-03	BTK, CDKN1A, FGF1, FLT4, HOXA9, MAP3K3, SMAD3	7
Cellular Growth and Proliferation	proliferation of chondrocytes	6.42E-03	BMPR1B, CDKN1A, FGF1, FGF18	4
Cellular Growth and Proliferation	growth of thyroid tumor cell lines	6.54E-03	ID1, MDM2	2
Cellular Growth and Proliferation	growth of cell lines	8.37E-03	AR, BAG4, BTG2, CAMK2N1, CAMK2N2, CDC42, CDK6, CDKN1A, CREB1, EMILIN2, EPHA2, FGF1, FGF18, FTL, HOXC6, ID1, IGF1R, INHBA, JUN, MBD2, MDM2, MLL, PTPN14, SLC30A1, WT1	25
Cellular Growth and Proliferation	colony formation of osteoclast precursor cells	8.61E-03	HOXA9, MLL	2
Cellular Growth and Proliferation	growth of erythroid progenitor cells	8.61E-03	BTK, WT1	2
Cellular Growth and Proliferation	growth of exocrine cells	8.61E-03	AR, FGF1	2
Cellular Growth and Proliferation	colony formation of erythroid cell lines	1.09E-02	HOXA9, MLL	2
Cellular Growth and Proliferation	growth of pre-B lymphocytes	1.09E-02	BTK, MDM2	2
Cellular Growth and Proliferation	proliferation of splenocytes	1.12E-02	BTK, CDKN1A, MAP3K3, SMAD3	4
Cellular Growth and Proliferation	colony formation of connective tissue cells	1.27E-02	CDKN1A, HOXA9, MLL	3
Cellular Growth and Proliferation	proliferation of lymphatic endothelial cells	1.35E-02	FGF1, FLT4	2
Cellular Growth and Proliferation	formation of osteoclasts	1.38E-02	CDKN1A, FGF18, INHBA, WT1	4
Cellular Growth and Proliferation	growth of fibroblasts	1.46E-02	CDKN1A, IGF1R, JUN, MDM2, MLL	5
Cellular Growth and Proliferation	proliferation of prostate cancer cell lines	1.69E-02	AR, HOXC6, INHBA, NGFR, NKX3-1	5
Cellular Growth and Proliferation	proliferation of vascular smooth muscle cells	1.78E-02	CDKN1A, CDKN1C, HSPD1, PPARA	4
Cellular Growth and Proliferation	antiproliferative response of smooth muscle cells	1.82E-02	CDKN1A	1
Cellular Growth and Proliferation	arrest in growth of brain cancer cell lines	1.82E-02	CDKN1A	1
Cellular Growth and Proliferation	arrest in growth of fibrosarcoma cell lines	1.82E-02	CDKN1A	1
Cellular Growth and Proliferation	arrest in growth of trophectoderm cells	1.82E-02	SMARCA5	1

## Sheet: death
© 2000-2011 Ingenuity Systems, Inc. All rights reserved.
Category	Functions Annotation	p-Value	Molecules	# Molecules
Cell Death	cell death of eukaryotic cells	7.93E-08	ADAM12, AR, ARID1A, ATP2B4, BAG4, BIK, BMPR1B, BTG2, BTK, CALB1, CAMK2N2, CD7, CDC42, CDK6, CDKN1A, CDKN1C, CREB1, EMILIN2, EMP2, EPHA2, FAAH, FIP1L1, FLT4, FOXF2, GADD45B, GNAS, HDAC9, HOXA9, HOXC6, HSPB6, HSPBAP1, HSPD1, ID1, ID2, ID3, IGF1R, INHBA, JUN, LAMA4, MAP2K5, MDM2, MGP, MLL, NFKBIA, NGFR, PIAS1, PINK1, PLK3, PMEPA1, PPARA, PRKCB, PRKRA, PRMT2, RAP1GAP, RASA4, RGS10, S1PR2, S1PR3, SCD,…	71
Cell Death	cell death	2.70E-07	ADAM12, AR, ARID1A, ATP2B4, BAG4, BIK, BMPR1B, BTG2, BTK, CALB1, CAMK2N2, CCDC88A, CD7, CDC42, CDK6, CDKN1A, CDKN1C, CREB1, EMILIN2, EMP2, EPHA2, FAAH, FGD4, FIP1L1, FLT4, FOXF2, GADD45B, GNAS, GNLY, HDAC9, HOXA9, HOXC6, HSPB6, HSPBAP1, HSPD1, ID1, ID2, ID3, IGF1R, INHBA, INSL6, JUN, LAMA4, MAP2K5, MDM2, MGP, MLL, NFKBIA, NGFR, PGF, PIAS1, PINK1, PLK3, PMEPA1, PPARA, PRKCB, PRKRA, PRMT2, PROP1, R…	81
Cell Death	apoptosis of eukaryotic cells	5.14E-07	ADAM12, AR, ATP2B4, BIK, BMPR1B, BTG2, BTK, CALB1, CAMK2N2, CD7, CDC42, CDK6, CDKN1A, CDKN1C, CREB1, EMILIN2, EPHA2, FIP1L1, FLT4, FOXF2, GADD45B, GNAS, HOXA9, HOXC6, HSPB6, HSPD1, ID1, ID2, ID3, IGF1R, INHBA, JUN, LAMA4, MAP2K5, MDM2, MGP, MLL, NFKBIA, NGFR, PIAS1, PINK1, PLK3, PMEPA1, PPARA, PRKCB, PRKRA, PRMT2, RASA4, S1PR2, S1PR3, SCD, SCN3B, SEMA3F, SERPINA3, SMAD3, STAMBP, STK4, TRIB3, TRPS…	60
Cell Death	apoptosis of cell lines	1.21E-06	AR, BIK, BTG2, CALB1, CAMK2N2, CD7, CDC42, CDK6, CDKN1A, CDKN1C, CREB1, EMILIN2, EPHA2, FIP1L1, GADD45B, HOXC6, HSPD1, ID1, ID2, IGF1R, INHBA, JUN, MAP2K5, MDM2, MGP, MLL, NFKBIA, NGFR, PIAS1, PINK1, PLK3, PMEPA1, PRKCB, PRKRA, PRMT2, RASA4, S1PR2, S1PR3, SCD, SCN3B, SEMA3F, STK4, TRIB3, TRPS1, WT1	45
Cell Death	apoptosis	1.26E-06	ADAM12, AR, ATP2B4, BIK, BMPR1B, BTG2, BTK, CALB1, CAMK2N2, CCDC88A, CD7, CDC42, CDK6, CDKN1A, CDKN1C, CREB1, EMILIN2, EPHA2, FGD4, FIP1L1, FLT4, FOXF2, GADD45B, GNAS, GNLY, HOXA9, HOXC6, HSPB6, HSPD1, ID1, ID2, ID3, IGF1R, INHBA, INSL6, JUN, LAMA4, MAP2K5, MDM2, MGP, MLL, NFKBIA, NGFR, PIAS1, PINK1, PLK3, PMEPA1, PPARA, PRKCB, PRKRA, PRMT2, PROP1, RASA4, RHEB, S1PR2, S1PR3, SCD, SCN3B, SEMA3F, S…	70
Cell Death	cell death of cell lines	1.89E-06	AR, ARID1A, BAG4, BIK, BTG2, CALB1, CAMK2N2, CD7, CDC42, CDK6, CDKN1A, CDKN1C, CREB1, EMILIN2, EMP2, EPHA2, FIP1L1, GADD45B, HOXC6, HSPBAP1, HSPD1, ID1, ID2, IGF1R, INHBA, JUN, MAP2K5, MDM2, MGP, MLL, NFKBIA, NGFR, PIAS1, PINK1, PLK3, PMEPA1, PRKCB, PRKRA, PRMT2, RAP1GAP, RASA4, RGS10, S1PR2, S1PR3, SCD, SCN3B, SEMA3F, STK4, TRIB3, TRPS1, WT1	51
Cell Death	apoptosis of tumor cell lines	3.08E-06	AR, BIK, BTG2, CAMK2N2, CD7, CDC42, CDK6, CDKN1A, CDKN1C, CREB1, EMILIN2, EPHA2, GADD45B, HOXC6, HSPD1, IGF1R, INHBA, JUN, MAP2K5, MDM2, MLL, NFKBIA, NGFR, PIAS1, PINK1, PLK3, PMEPA1, PRKCB, PRKRA, S1PR2, S1PR3, SCD, SCN3B, SEMA3F, STK4, TRPS1, WT1	37
Cell Death	cell death of muscle cells	4.07E-05	ADAM12, ATP2B4, CDKN1A, CDKN1C, GNAS, HSPB6, HSPD1, ID2, IGF1R, INHBA, MDM2, PRKCB, STK4	13
Cell Death	cell death of fibroblast cell lines	5.20E-05	ARID1A, CALB1, CDK6, CDKN1A, CDKN1C, EMP2, GADD45B, HSPBAP1, HSPD1, ID1, ID2, JUN, NGFR, PRKRA, RASA4, SEMA3F, STK4, TRPS1	18
Cell Death	cell death of tumor cell lines	7.53E-05	AR, BIK, BTG2, CAMK2N2, CD7, CDC42, CDK6, CDKN1A, CDKN1C, CREB1, EMILIN2, EPHA2, GADD45B, HOXC6, HSPD1, IGF1R, INHBA, JUN, MAP2K5, MDM2, MLL, NFKBIA, NGFR, PIAS1, PINK1, PLK3, PMEPA1, PRKCB, PRKRA, RAP1GAP, S1PR2, S1PR3, SCD, SCN3B, SEMA3F, STK4, TRPS1, WT1	38
Cell Death	apoptosis of normal cells	1.01E-04	ADAM12, ATP2B4, BIK, BMPR1B, BTG2, BTK, CALB1, CD7, CDKN1A, CDKN1C, CREB1, FLT4, FOXF2, GADD45B, GNAS, HOXA9, HSPB6, HSPD1, ID2, ID3, IGF1R, INHBA, JUN, LAMA4, MDM2, NFKBIA, NGFR, PPARA, PRKCB, PRMT2, SCD, SERPINA3, SMAD3, STAMBP, STK4, WT1	36
Cell Death	apoptosis of muscle cells	1.50E-04	ATP2B4, CDKN1A, CDKN1C, GNAS, HSPB6, HSPD1, ID2, IGF1R, INHBA, MDM2, STK4	11
Cell Death	cell death of normal cells	1.54E-04	ADAM12, ATP2B4, BIK, BMPR1B, BTG2, BTK, CALB1, CD7, CDKN1A, CDKN1C, CREB1, FAAH, FLT4, FOXF2, GADD45B, GNAS, HDAC9, HOXA9, HSPB6, HSPD1, ID2, ID3, IGF1R, INHBA, JUN, LAMA4, MDM2, NFKBIA, NGFR, PPARA, PRKCB, PRMT2, SCD, SDHA, SERPINA3, SH3KBP1, SMAD3, SMARCA5, STAMBP, STK4, WT1	41
Cell Death	apoptosis of fibroblast cell lines	6.08E-04	CALB1, CDKN1A, CDKN1C, HSPD1, ID1, ID2, JUN, NGFR, PRKRA, RASA4, SEMA3F, STK4, TRPS1	13
Cell Death	cell death of epithelial cell lines	6.11E-04	BAG4, CALB1, CDC42, EMP2, HSPD1, IGF1R, JUN, PIAS1, PRMT2, STK4, TRIB3	11
Cell Death	survival of normal cells	1.07E-03	BTK, CREB1, FGF1, GADD45B, HSPB6, HSPD1, ID2, IGF1R, JUN, MDM2, NGFR, NKX3-1, PINK1, PRKCB, SMAD3, STAMBP, TMEM158	17
Cell Death	survival of fibroblast cell lines	1.30E-03	CDKN1A, EMILIN2, FGF1, HSPBAP1, JUN	5
Cell Death	cell death of neurons	1.48E-03	BMPR1B, CALB1, CDKN1A, CREB1, FAAH, HDAC9, ID2, IGF1R, INHBA, JUN, NFKBIA, NGFR, SDHA, SERPINA3, SH3KBP1, STAMBP, STK4	17
Cell Death	cell death of kidney cell lines	1.79E-03	BAG4, CALB1, CDC42, EMP2, IGF1R, PIAS1, PRMT2, STK4, TRIB3, TRPS1	10
Cell Death	cell death of embryonic cell lines	2.24E-03	BAG4, CALB1, CDC42, EMP2, IGF1R, PIAS1, PRMT2, STK4, TRIB3	9
Cell Death	apoptosis of heart	3.19E-03	MAP2K5, SCD	2
Cell Death	cell death of neuronal hybrid cells	3.19E-03	CALB1, RGS10	2
Cell Death	cell viability of muscle cell lines	3.19E-03	CDKN1A, IGF1R	2
Cell Death	survival of cardiomyocytes	3.19E-03	HSPB6, HSPD1	2
Cell Death	survival of eukaryotic cells	3.19E-03	BTK, CALB1, CAMK2N1, CASK, CDK6, CDKN1A, CREB1, EMILIN2, FGF1, GADD45B, HHEX, HSPB6, HSPBAP1, HSPD1, ID2, IGF1R, JUN, MDM2, NGFR, NKX3-1, PINK1, PRKCB, SMAD3, STAMBP, TMEM158	25
Cell Death	apoptosis of prostate cancer cell lines	3.23E-03	AR, CREB1, HOXC6, HSPD1, INHBA, NGFR, TRPS1	7
Cell Death	apoptosis of B lymphocytes	3.36E-03	BTK, CDKN1A, MDM2, NFKBIA, PRKCB, SMAD3	6
Cell Death	apoptosis of breast cell lines	3.61E-03	ID1, IGF1R, JUN, NFKBIA	4
Cell Death	survival of muscle cells	3.98E-03	HSPB6, HSPD1, IGF1R	3
Cell Death	survival of cells	4.04E-03	BTK, CALB1, CAMK2N1, CASK, CDK6, CDKN1A, CREB1, EMILIN2, FGF1, GADD45B, HHEX, HSPB6, HSPBAP1, HSPD1, ID2, IGF1R, JUN, MDM2, NGFR, NKX3-1, PGF, PINK1, PRKCB, SMAD3, STAMBP, TMEM158	26
Cell Death	cell death of embryonic tissue	4.73E-03	SMARCA5, WT1	2
Cell Death	self-renewal of embryonic cell lines	4.73E-03	EXT1, IGF1R	2
Cell Death	cell death of leukemia cell lines	5.73E-03	CD7, CDKN1A, EMILIN2, INHBA, JUN, MLL, NFKBIA, PRKCB, STK4, WT1	10
Cell Death	apoptosis of myoblasts	6.54E-03	CDKN1A, CDKN1C	2
Cell Death	apoptosis of lymphocytes	7.57E-03	BTK, CDKN1A, GNAS, HOXA9, ID3, JUN, MDM2, NFKBIA, PPARA, PRKCB, SMAD3	11
Cell Death	apoptosis of leukemia cell lines	7.59E-03	CD7, CDKN1A, INHBA, JUN, MLL, NFKBIA, PRKCB, STK4, WT1	9
Cell Death	apoptosis of rhabdomyosarcoma cell lines	8.61E-03	CDKN1A, JUN	2
Cell Death	apoptosis of colon cancer cell lines	8.71E-03	BIK, CDKN1A, CDKN1C, HSPD1, MLL, PLK3, PMEPA1, SCN3B	8
Cell Death	apoptosis of hepatoma cell lines	9.46E-03	CDKN1A, INHBA, S1PR2, S1PR3, SCD	5
Cell Death	cell death of hybrid cells	1.02E-02	CALB1, INHBA, RGS10	3
Cell Death	apoptosis of lung cancer cell lines	1.13E-02	CDKN1A, CDKN1C, CREB1, EPHA2, GADD45B, MDM2	6
Cell Death	cell death of cancer cells	1.18E-02	AR, BIK, CDKN1A, EMP2, IGF1R, JUN, NGFR	7
Cell Death	apoptosis of epithelial cell lines	1.58E-02	CALB1, HSPD1, JUN, PIAS1, PRMT2, STK4, TRIB3	7
Cell Death	apoptosis of adipocytes	1.63E-02	CDKN1A, IGF1R	2
Cell Death	cell death of brain cells	1.74E-02	CDKN1A, HDAC9, IGF1R, JUN, NFKBIA, NGFR, SERPINA3, STK4	8
Cell Death	apoptosis of hepatoblasts	1.82E-02	JUN	1
Cell Death	apoptosis of lymphatic endothelial cells	1.82E-02	FLT4	1
Cell Death	apoptosis of metanephric blastema	1.82E-02	WT1	1
Cell Death	apoptosis of neuronal hybrid cells	1.82E-02	CALB1	1
Cell Death	arrest in sub-G1 phase of mesothelioma cells	1.82E-02	CDKN1A	1
Cell Death	cell death of trophectoderm cells	1.82E-02	SMARCA5	1

## Sheet: tumourigenesis
© 2000-2011 Ingenuity Systems, Inc. All rights reserved.
Category	Functions Annotation	p-Value	Molecules	# Molecules
Cancer	head and neck cancer	2.01E-06	ADAM12, AR, BTG2, CDC42, CDK6, CDKN1A, CHRNA10, EPHA2, FGF1, FLT4, GNAS, GRIA3, HDAC9, ID2, IGF1R, JUN, KIF11, LAMA4, MDM2, MLL3, PGF, PINK1, PRKCB, RAP1GAP, SEMA3F, TRIM33	26
Cancer	carcinoma	2.72E-06	ADAM12, AKR1D1, AR, BMPR1B, BTG2, CAMK2N1, CAMK2N2, CCDC88A, CDKN1A, CDKN1C, E2F8, EPHA2, EPHB2, F12, FGD4, FGF18, FLT4, FTL, GAD1, GADD45B, HDAC9, ID1, IGF1R, INHBA, JUN, KIF11, LAMA4, MALAT1, MBNL1, MDM2, MGP, MLL3, MT1X, N4BP1, N4BP2L1, NFKBIA, NKTR, NKX2-8, NRIP1, PLXDC1, PPARA, PRKCB, PRKRA, RAP1GAP, SCD, SEMA3F, SMAD3, STK4, TFDP2, TNXB, TRIM33, WT1	52
Cancer	malignant tumor	4.79E-06	ADAM12, AKR1D1, AR, BMPR1B, BTG2, CAMK2N1, CAMK2N2, CCDC88A, CDK6, CDKN1A, CDKN1C, CHRNA10, DIAPH3, E2F8, EPHA2, EPHB2, EXT1, F12, FGD4, FGF18, FLT4, FTL, GAD1, GADD45B, HDAC9, ID1, ID2, IGF1R, INHBA, JUN, KIF11, LAMA4, MALAT1, MBNL1, MDM2, MGP, MLL3, MT1X, N4BP1, N4BP2L1, NFKBIA, NKTR, NKX2-8, NRIP1, PINK1, PLXDC1, PPARA, PRKCB, PRKRA, RAP1GAP, SCD, SCN3B, SEMA3F, SMAD3, STK4, TFDP2, TNXB, TRIM3…	59
Cancer	cancer	5.06E-06	ADAM12, AKR1D1, AR, BAG4, BMPR1B, BTG2, CALD1, CAMK2N1, CAMK2N2, CCDC88A, CDC42, CDK6, CDKN1A, CDKN1C, CHRNA10, CPEB4, CST6, DIAPH3, DLEU2, DMXL1, E2F8, EIF4G3, EPHA2, EPHB2, EXT1, F12, FGD4, FGF1, FGF18, FLT4, FOXF2, FRY, FTL, GAD1, GADD45B, GNAS, GRIA3, HDAC9, HOOK3, HOXA9, HOXC6, ID1, ID2, IGF1R, INHBA, ISG20, JUN, KIAA1370, KIF11, LAMA4, LPP, MALAT1, MBD2, MBNL1, MDM2, MGP, MLL, MLL3, MT1X, N…	93
Cancer	tumorigenesis	1.56E-05	ADAM12, AKR1D1, AR, BAG4, BMPR1B, BTG2, BTK, CALB1, CALD1, CAMK2N1, CAMK2N2, CCDC88A, CDC42, CDK6, CDKN1A, CDKN1C, CHRNA10, CPEB4, CST6, DIAPH3, DLEU2, DMXL1, E2F8, EIF4G3, EMP2, EPHA2, EPHB2, EXT1, F12, FGD4, FGF1, FGF18, FLT4, FOXF2, FRY, FTL, GAD1, GADD45B, GNAS, GRIA3, HDAC9, HOOK3, HOXA9, HOXC6, ID1, ID2, IGF1R, INHBA, ISG20, JUN, KIAA1370, KIF11, KRIT1, LAMA4, LPP, MALAT1, MBD2, MBNL1, MDM2…	98
Cancer	astrocytoma	1.21E-04	CDK6, EPHA2, FLT4, GRIA3, ID2, MDM2, PINK1, PRKCB	8
Cancer	head and neck tumor	1.24E-04	BTG2, CDK6, EPHA2, FGF1, FLT4, GNAS, GRIA3, HDAC9, ID2, JUN, KIF11, LAMA4, MDM2, MLL3, PINK1, PRKCB, RAP1GAP, SEMA3F, TRIM33	19
Cancer	glioma	2.57E-04	CDK6, EPHA2, FGF1, FLT4, GRIA3, ID2, MDM2, MLL3, PINK1, PRKCB	10
Cancer	tumor	3.13E-04	ADAM12, AKR1D1, AR, BMPR1B, BTG2, CALB1, CAMK2N1, CAMK2N2, CCDC88A, CDK6, CDKN1A, CDKN1C, CHRNA10, DIAPH3, E2F8, EPHA2, EPHB2, EXT1, F12, FGD4, FGF1, FGF18, FLT4, FTL, GAD1, GADD45B, GNAS, GRIA3, HDAC9, ID1, ID2, IGF1R, INHBA, JUN, KIF11, KRIT1, LAMA4, MALAT1, MBNL1, MDM2, MGP, MLL3, MT1X, N4BP1, N4BP2L1, NFKBIA, NGFR, NKTR, NKX2-8, NRIP1, PGF, PINK1, PLXDC1, PPARA, PRKCB, PRKRA, RAP1GAP, SCD, SC…	67
Cancer	colorectal cancer	3.99E-04	AR, CALD1, CAMK2N1, CCDC88A, CDKN1A, CHRNA10, CPEB4, EIF4G3, EPHB2, F12, FGF1, FLT4, FOXF2, FRY, HDAC9, HOXA9, HOXC6, ID2, IGF1R, INHBA, ISG20, JUN, KIAA1370, MT1X, NGFR, PGF, PPARA, RAP1GAP, SERPINA3, SLC12A8, SMAD3, TFPI	32
Cancer	brain cancer	4.28E-04	BTG2, CDK6, EPHA2, FGF1, FLT4, GRIA3, HOXA9, ID2, KIF11, MDM2, MLL3, PINK1, PRKCB	13
Cancer	lung cancer	5.14E-04	AR, CDK6, CDKN1A, CDKN1C, CHRNA10, EPHA2, FLT4, FTL, GADD45B, HDAC9, ID1, IGF1R, JUN, KIF11, MALAT1, MDM2, NKX2-8, PGF, PINK1, PRKCB, PRKRA, WT1	22
Cancer	brain tumor	5.16E-04	BTG2, CDK6, EPHA2, FGF1, FLT4, GRIA3, ID2, KIF11, MDM2, MLL3, PINK1, PRKCB	12
Cancer	sarcoma	5.46E-04	CDK6, CDKN1A, CHRNA10, DIAPH3, EPHA2, EPHB2, EXT1, FLT4, HDAC9, IGF1R, JUN, KIF11, MDM2, PINK1	14
Cancer	central nervous system tumor	7.61E-04	BTG2, CDK6, EPHA2, FGF1, FLT4, GRIA3, HDAC9, ID2, KIF11, MDM2, MLL3, PINK1, PRKCB	13
Cancer	transformation of myeloid progenitor cells	9.80E-04	HOXA9, MLL	2
Cancer	lymphatic node tumor	1.20E-03	CDK6, EPHA2, GADD45B, HDAC9, ID1, ID2, JUN, KIF11, MDM2, NFKBIA, PRKCB	11
Cancer	digestive organ tumor	1.34E-03	ADAM12, AKR1D1, CAMK2N1, CCDC88A, CDKN1A, E2F8, EPHA2, EPHB2, F12, FLT4, FTL, GAD1, HDAC9, JUN, LAMA4, MLL3, NRIP1, PPARA, RAP1GAP, SCD, SEMA3F, TFDP2	22
Cancer	metastasis	1.42E-03	CCDC88A, EPHA2, FGF1, FLT4, FOXF2, FRY, HDAC9, HOXA9, HOXC6, ID2, IGF1R, MBD2, NFKBIA, PPARA, PRKCB, SLC12A8, SMAD3, TFPI	18
Cancer	lymphomagenesis	1.57E-03	CDK6, CDKN1A, EPHA2, GADD45B, HDAC9, ID1, ID2, JUN, KIF11, MDM2, NFKBIA, PRKCB, WT1	13
Cancer	tumorigenesis of tumor cell lines	1.85E-03	CAMK2N2, CCDC88A, CDKN1A, E2F8, GNAS, LPP, MBD2, NFKBIA	8
Cancer	non-small cell lung cancer	1.88E-03	AR, CDK6, CDKN1A, EPHA2, FLT4, FTL, HDAC9, ID1, MALAT1, MDM2, NKX2-8, PGF, PRKCB, WT1	14
Cancer	neoplasia of tissue	1.94E-03	AR, EPHA2	2
Cancer	transformation of normal cells	1.94E-03	CDKN1A, EPHA2, HOXA9, ID2, JUN, MDM2, MLL, PBX2	8
Cancer	synovial sarcoma	2.31E-03	EPHB2, FLT4, IGF1R	3
Cancer	lymphoma	2.36E-03	CDK6, CDKN1A, EPHA2, GADD45B, HDAC9, ID1, ID2, JUN, KIF11, MDM2, NFKBIA, PRKCB	12
Cancer	transformation	2.88E-03	BTG2, CDK6, CDKN1A, CDKN1C, EPHA2, FIP1L1, HOXA9, HOXD10, ID2, IGF1R, JUN, MDM2, MLL, NGFR, PBX2	15
Cancer	neuroendocrine tumor	2.91E-03	CDKN1A, FLT4, GAD1, GNAS, IGF1R, LAMA4, MLL3	7
Cancer	non-hodgkin lymphoma	3.19E-03	CDK6, EPHA2, GADD45B, HDAC9, ID1, JUN, KIF11, MDM2, NFKBIA, PRKCB	10
Cancer	liver cancer	3.62E-03	ADAM12, AKR1D1, CDK6, CDKN1A, CHRNA10, E2F8, EPHA2, FLT4, FTL, HDAC9, IGF1R, JUN, PPARA, SCD, XIST	15
Cancer	endocrine gland tumor	3.96E-03	BMPR1B, CDKN1A, FLT4, GAD1, GNAS, IGF1R, LAMA4, MLL3, RAP1GAP, TRIM33	10
Cancer	leiomyosarcoma	4.01E-03	CDKN1A, DIAPH3, FLT4, IGF1R	4
Cancer	transformation of cells	4.63E-03	BTG2, CDK6, CDKN1A, CDKN1C, EPHA2, FIP1L1, HOXA9, ID2, IGF1R, JUN, MDM2, MLL, NGFR, PBX2	14
Cancer	large cell lung carcinoma	4.73E-03	MALAT1, MDM2	2
Cancer	tumorigenesis of ovarian cancer cell lines	4.73E-03	CAMK2N2, LPP	2
Cancer	glioblastoma	5.74E-03	CDK6, FLT4, MDM2, PINK1, PRKCB	5
Cancer	hepatocellular carcinoma	5.76E-03	ADAM12, AKR1D1, CDKN1A, E2F8, FLT4, FTL, JUN, PPARA, SCD	9
Cancer	lymphoid cancer	6.06E-03	CDK6, CDKN1A, CHRNA10, EPHA2, FLT4, GADD45B, HDAC9, ID1, ID2, JUN, KIF11, MDM2, NFKBIA, PRKCB	14
Cancer	hyperproliferation of brain cells	6.54E-03	BTG2, CDKN1C	2
Cancer	tumorigenesis of prostate cancer cell lines	6.54E-03	GNAS, NFKBIA	2
Cancer	renal cancer	6.71E-03	AR, BTG2, CDK6, CHRNA10, FLT4, HDAC9, MDM2, NFKBIA, PRKCB, WT1	10
Cancer	cutaneous T-cell lymphoma	7.00E-03	HDAC9, JUN, NFKBIA, PRKCB	4
Cancer	mesenchymal tumor	7.61E-03	CDKN1A, EPHA2, FLT4, WT1	4
Cancer	anaplastic astrocytoma	8.09E-03	CDK6, FLT4, GRIA3	3
Cancer	hyperproliferation of eukaryotic cells	8.40E-03	BTG2, BTK, CDKN1A, CDKN1C, GNAS, IGF1R, PRKCB, SMAD3	8
Cancer	T-cell non-hodgkin lymphoma	8.57E-03	GADD45B, HDAC9, ID1, JUN, NFKBIA, PRKCB	6
Cancer	chondrosarcoma	8.61E-03	EPHA2, EXT1	2
Cancer	development of malignant tumor	8.93E-03	ID1, JUN, NFKBIA, PPARA, SMAD3	5
Cancer	development of carcinoma	8.93E-03	JUN, NFKBIA, PPARA, SMAD3	4
Cancer	adrenal cortex tumor	9.12E-03	BMPR1B, FLT4, IGF1R	3
Cancer	pancreatic cancer	9.34E-03	CDKN1A, CHRNA10, DMXL1, EPHA2, FLT4, GAD1, IGF1R, LAMA4, MLL3, NKX2-8	10
Cancer	pancreatic adenocarcinoma	1.04E-02	CDKN1A, GAD1, LAMA4, MLL3	4
Cancer	leukemia	1.04E-02	CDK6, CDKN1A, CHRNA10, DLEU2, EPHA2, FLT4, HDAC9, HOXA9, JUN, LPP, MLL, PRKCB, TET2, WT1	14
Cancer	transformation of eukaryotic cells	1.05E-02	BTG2, CDK6, CDKN1A, EPHA2, FIP1L1, HOXA9, ID2, IGF1R, JUN, MDM2, MLL, PBX2	12
Cancer	tumorigenesis of colon	1.09E-02	PRKCB, SMAD3	2
Cancer	tumorigenesis of organ	1.18E-02	CDKN1A, EPHA2, JUN, NKX3-1, PPARA, PRKCB, SMAD3	7
Cancer	tumorigenesis of eukaryotic cells	1.31E-02	BTK, CAMK2N2, CCDC88A, CDKN1A, CDKN1C, E2F8, EMP2, GNAS, LPP, MBD2, NFKBIA	11
Cancer	myeloid leukemia	1.49E-02	EPHA2, FLT4, HOXA9, JUN, LPP, MLL, TET2, WT1	8
Cancer	pancreatic carcinoma	1.61E-02	CDKN1A, FLT4, GAD1, LAMA4, MLL3	5
Cancer	adenocarcinoma	1.62E-02	AR, CAMK2N1, CDKN1C, FGF18, FLT4, GADD45B, INHBA, KIF11, MALAT1, MDM2, MGP, PRKRA, RAP1GAP, SMAD3, TRIM33	15
Cancer	cancer of rats	1.82E-02	PPARA	1
